# Supplementary material for: Synthesis and reactivity of the imidotungsten methyl cation [W(N2Npy)(NPh)Me]+: CO2adds to the WNPh bond and does not insert into the W–Me bond
Source: Royal Society of Chemistry journal article supplement (doi:10.1039/b208327b), 2002-01-01
Supplement: b208327b-x.doc [file b208327b-x.doc]

*Crystal data for* ***2***: C23H40N4Si2W, *M* = 612.62, monoclinic, *P*21*/n*, *a* = 10.6452(2), *b* = 16.4633(3), *c* = 15.2794(2) Å,  = 91.659(1) o, *U* = 2676.67(8) Å3, *Z* = 4, *T* = 150 K,  = 4.42 mm-1, 6111 independent reflections (*R*merge = 0.01), 4338 [*I* > 3(*I*)] used in refinement, final *R* indices: *R* = 0.0227, *R*w = 0.0106. CCDC 192521.
