# Supplementary material for: Synthesis and reactivity of the imidotungsten methyl cation [W(N2Npy)(NPh)Me]+: CO2adds to the WNPh bond and does not insert into the W–Me bond
Source: Royal Society of Chemistry journal article supplement (doi:10.1039/b208327b), 2002-01-01
Supplement: b208327bchar.doc [file b208327bchar.doc]

Synthesis and reactivity of the imidotungsten methyl cation [W(N2Npy)(NPh)Me]: CO2 adds to the W=NPh bond and does not insert into the W-Me bond

**Benjamin D. Ward,*a* Eric Clot,*b* Stuart R. Dubberley,*a* Lutz H. Gade*c* and Philip Mountford*a***

______________________________________________________________________________________

SUPPLEMENTARY INFORMATION: SELECTED EXPERIMENTAL AND CHARACTERISING DATA

______________________________________________________________________________________

**[W(N2Npy)(NPh)Cl2] (1)**

To a stirred solution of [W(NPh)Cl4(THF)] (300 mg, 0.614 mmol) in benzene (20 ml) cooled to 7 oC was added a cooled (7 oC) solution of Li2N2Npy (197 mg, 0.614 mmol, 1 eq) in benzene (20 ml) dropwise over ca. 15 min. The resulting dark red mixture was allowed to warm to rt and stirred for a further 1 h. before filtering away from LiCl and subsequent removing of the volatiles under reduced pressure. The resulting brown solid was washed with pentane (3 x 20 ml) before drying *in vacuo* to yield [W(NPh)(N2Npy)Cl2] as a dark red solid. Yield 337 mg (0.516 mmol, 84 %).

**Elemental analysis for C21H34Cl2N4Si2W**

Found (calculated): C 38.3 (38.6), H 4.6 (5.2), N 8.6 (8.6) %

**1H NMR data:** (C6D6, 300.2 MHz, 298 K)

10.27 1 H, dd, 3J (H5H6) = 5.9 Hz

4J (H4H6) = 1.5 Hz H6 of 2-C5H4N

7.81 2 H, d, 3J = 7.8 Hz *o-*C6H5

7.22 2 H, app. t, app. 3J = 7.8 Hz *m-*C6H5

6.92 1 H, td, 3J (H3H4H5) = 7.7 Hz

4J (H4H6) = 1.5 Hz H4 of 2-C5H4N

6.74 1 H, t, 3J = 7.8 Hz *p-*C6H5

6.67 1 H, d, 3J (H3H4) = 7.9 Hz H3 of 2-C5H4N

6.51 1 H, td, 3J (H4H5H6) = 6.8 Hz

4J (H3H5) = 1.1 Hz H5 of 2-C5H4N

3.82 4 H, overlapping d, 2J = 13.5 Hz CH2

0.92 3 H, s Me of N2Npy

0.29 18 H, s SiMe3

**13C-{1H} NMR data:** (C6D6, 125.7 MHz, 298 K)

160.5 C2 of 2-C5H4N

154.7 C6 of 2-C5H4N

139.9 *ipso-*C6H5

128.4 *o-*C6H5

128.3 *m-*C6H5

127.5 *p-*C6H5

126.5 C4 of 2-C5H4N

122.7 C5 of 2-C5H4N

117.3 C3 of 2-C5H4N

62.1 CH2NSiMe3

49.9 C(CH2NSiMe3)2

20.8 Me of N2Npy

-0.3 SiMe3

**IR data:** (KBr plates, Nujol, cm-1)

2860 (s), 1640 (m), 1610 (m), 1595 (m), 1495 (m), 1260 (m), 1255 (m), 1040 (m), 920 (w), 840 (m), 810 (m), 695 (w), 620 (w)

**E.I. mass spectrum:**

*m/z* = 654 (1 %) [M]+

*m/z* = 639 (2 %) [M – Me]+

*m/z* = 584 (2 %) [M – 2 Cl]+

**[W(N2Npy)(NPh)Me2] (2)**

[W(NPh)(N2Npy)Cl2] (**1**) (600 mg, 0.918 mmol) was dissolved in benzene (30 ml) and cooled to 7 oC. To this dark red solution was added MeMgBr (1.31 ml of a 1.4 M solution in 25:75 THF:toluene, 1.84 mmol, 2 eq) dropwise. The reaction was allowed to warm to ambient temperature. After stirring for a further 2 h. 1,4-dioxane (1 ml) was added to aid precipitation of magnesium salts. The precipitated salts were removed by filtration and the volatiles were removed from the filtrate under reduced pressure. The crude product was extracted with pentane (3 x 20 ml) and the solvent removed from the combined extracts under reduced pressure to yield 165 mg (0.321 mmol, 35 %) of [W(NPh)(N2Npy)Me2] as a red crystalline solid. Single crystals suitable for X-Ray diffraction were grown from a saturated pentane solution. The compounds [W(NPh)(N2Npy)(13CH3)2] (**2**-13C2) and [W(NPh)(N2Npy)(CD3)2] (**2**-d6) were prepared by an analogous method using 13CH3MgI and CD3MgI in 34 % and 22 % yields respectively.

**Elemental analysis for C23H40N4Si2W**

Found (calculated): C 44.5 (45.1), H 6.5 (6.6), N 9.1 (9.2) %

**1H NMR data:** (C6D6, 300.2 MHz, 298 K)

8.91 1 H, dd, 3J (H5H6) = 5.7 Hz

4J (H4H6) = 1.5 Hz H6 of 2-C5H4N

7.54 2 H, d, 3J = 7.5 Hz *o-*C6H5

7.27 2 H, app. t, app. 3J = 7.5 Hz *m-*C6H5

7.00 1 H, td, 3J (H3H4H5) = 7.9 Hz

4J (H4H6) = 1.5 Hz H4 of 2-C5H4N

6.85 1 H, overlapping m H3 of 2-C5H4N

6.85 1 H, overlapping m *p-*C6H5

6.50 1 H, m H5 of 2-C5H4N

3.39 4 H, s CH2

1.04 3 H, s Me of N2Npy

0.77 6 H, s, 2J (WH) = 5.4 Hz (15 %) WMe2

0.25 18 H, s SiMe3

**13C-{1H} NMR data:** (C6D6, 75.5 MHz, 298 K)

164.5 C2 of 2-C5H4N

151.5 C6 of 2-C5H4N

138.2 *o-*C6H5

128.7 *ipso-*C6H5

127.8 *m-*C6H5

126.4 *p-*C6H5

125.3 C4 of 2-C5H4N

121.7 C5 of 2-C5H4N

118.1 C3 of 2-C5H4N

61.9 CH2NSiMe3

52.5 C(CH2NSiMe3)2

38.8 1J (CH) = 120.5 Hz,

1J (WC) = 71 Hz (15 %) WMe2

22.8 Me of N2Npy

1.8 SiMe3

**IR data:** (KBr plates, Nujol, cm-1)

2726 (w), 2336 (w), 1732 (w), 1588 (m), 1256 (m), 1026 (w), 914 (m), 840 (m), 804 (w), 724 (w), 690 (w)

**E.I. mass spectrum:**

*m/z* = 612.6 (1%) [M]+

*m/z* = 597.5 (30%) [M – Me]+

**[W(N2Npy)(NPh)Me][MeB(C6F5)] (3)**

[W(NPh)(N2Npy)Me2] (**2**) (40.3 mg, 0.065 mmol) was dissolved in CD2Cl2 (0.5 ml) and this solution was added to solid B(C6F5)3 (33.5 mg, 0.065 mmol, 1 eq). The reaction immediately turned brown. The reaction was added to a NMR tube fitted with a J. Young Teflon valve, sealed and analysed by NMR spectroscopy *in situ*. Yield of **3** 100 % by NMR

Elemental analysis was not obtained for this compound which was insufficiently stable to be isolated.

**1H NMR data:** (CD2Cl2, 500.0 MHz, 298 K)

9.12 1 H, dd, 3J (H5H6) = 5.3 Hz

4J (H4H6) = 0.5 Hz H6 of 2-C5H4N

8.25 1 H, td, 3J (H3H4H5) = 8.0 Hz

4J (H4H6) = 0.5 Hz H4 of 2-C5H4N

7.77 1 H, dd, 3J (H3H4) = 8.0 Hz

4J (H3H5) = 0.5 Hz H3 of 2-C5H4N

7.68 1 H, td, 3J (H4H5H6) = 8.0 Hz

4J (H3H5) = 0.5 Hz H5 of 2-C5H4N

7.60 2 H, td, 3J = 4.9 Hz

4J = 2.0 Hz *m-*C6H5

7.32 3 H, m *o-*C6H5,

*p-*C6H5

4.29 2 H, d, 2J = 13.2 Hz CHH

3.99 2 H, d, 2J = 13.2 Hz CHH

1.72 3 H, s Me of N2Npy

1.46 3 H, s, 2J (WH) = 6.3 Hz (15 %) WMe

0.45 3 H, br, s BMe

0.17 18 H, s SiMe3

**13C NMR data:** (CD2Cl2, 125.7 MHz, 298 K)

161.0 C2 of 2-C5H4N

154.3 *ipso-*C6H5

149.6 C6F5

147.7 C6F5

146.5 1J (CH) = 183 Hz *o-*C6H5

142.8 1J (CH) = 168 Hz C6 of 2-C5H4N

138.8 C6F5

137.7 C6F5

136.8 C6F5

135.7 C6F5

129.5 1J (CH) = 162 Hz *m-*C6H5

128.2 1J (CH) = 162 Hz *p-*C6H5

125.1 1J (CH) = 170 Hz C4 of 2-C5H4N

124.6 1J (CH) = 162 Hz C5 of 2-C5H4N

120.8 1J (CH) = 167 Hz C3 of 2-C5H4N

64.9 1J (CH) = 144 Hz CH2NSiMe3

48.5  C(CH2NSiMe3)2

40.5 1J (CH) = 126 Hz

1J (WC) = 90 Hz (15 %) WM*e*

22.0 1J (CH) =131 Hz Me of N2Npy

10.5 br 1J (CH) = 118 Hz BMe

0.6 1J (CH) = 120 Hz SiMe3

**19F NMR data:** (CD2Cl2, 282.2 MHz, 298 K)

-133.4 6 F, d, 3J = 19.8 Hz *o-*C6F5

-165.6 6 F, app. t, app. 3J = 19.8 Hz *m-*C6F5

-168.1 3 F, t, 3J = 22.7 Hz *p-*C6F5

**11B NMR data:** (CD2Cl2, 160.4 MHz, 298 K)

-14.7 br. s MeB(C6F5)3

**IR data:** (KBr plates, Nujol, cm-1)

2363 (w), 1646 (m), 1608 (m), 1559 (s), 1377 (s), 1261 (s), 1083 (s), 1019 (w), 977 (m), 801 (s), 758 (w), 688 (w), 569 (w)

**[W(N2Npy)(NPh)Me(NCMe)][MeB(C6F5)3] (4)**

**Elemental analysis for C43H43BF15N5Si2W**

Found (calculated): C 44.1 (44.3), H 3.8 (3.7), N 6.4 (6.0) %

**1H NMR data:** (CD2Cl2, 500.0 MHz, 298 K)

8.85 1 H, d, 3J (H5H6) = 5.9 Hz H6 of 2-C5H4N

- 1. 1 H, td, 3J (H3H4H5) = 7.8 Hz

4J (H4H6) = 2.0 Hz H4 of 2-C5H4N

7.75 1 H, d, 3J (H3H4) = 8.3 Hz H3 of 2-C5H4N

7.59 – 7.54 3 H, overlapping m H5 of 2-C5H4N and *m-*C6H5

7.25 3 H, overlapping m *o-*C6H5 and *p-*C6H5

3.96 2 H, d, 2J = 14.0 Hz CHH

3.87 2 H, d, 2J = 14.0 Hz CHH

2.18 3 H, br. s NCMe

1.66 3 H, s Me of N2Npy

0.73 3 H, s, 2J (WH) = 5.6 Hz (15 %) WMe

0.44 3 H, br. s BMe

0.13 18 H, s SiMe3

**1H NMR data:** (CD2Cl2, 500.0 MHz, 183 K)

8.71 1 H, d, 3J (H5H6) = 7.1 Hz H6 of 2-C5H4N

8.10 1 H, t, 3J (H3H4H5) = 7.5 Hz H4 of 2-C5H4N

7.69 1 H, d, 3J (H3H4) = 8.1 Hz H3 of 2-C5H4N

7.53 - 7.49 3 H, overlapping m H5 of 2-C5H4N and *m-*C6H5

7.20 - 7.17 3 H, overlapping m *o-*C6H5 and *p-*C6H5

4.09 1 H, d, 2J = 15.3 Hz CHH

3.97 1 H, d, 2J = 15.5 Hz CHH

3.51 2 H, app. t, app. J = 14.9 Hz CHH

2.28 3 H, s NCMe

1.58 3 H, s Me of N2Npy

0.43 3 H, br. s WMe

0.30 3 H, br. s BMe

0.08 3 H, s SiMe3

-0.04 3 H, s SiMe3

**13C{1H} NMR data:** (CD2Cl2, 125,7 MHz, 183 K)

159.5 C2 of 2-C5H4N

152.9 *ipso-*C6H5

148.7 C6 of 2-C5H4N

148.0 C6F5

146.1 C6F5

137.5 C6F5

136.4 C6F5

135.5 C6F5

134.5 C6F5

128.5 C4 of 2-C5H4N

127.1 *o-*C6H5

126.8 *m-*C6H5

124.3 *p-*C6H5

122.3 C5 of 2-C5H4N

119.7 C3 of 2-C5H4N

59.3 CH2NSiMe3

54.4 CH2NSiMe3

50.7 C(CH2NSiMe3)2

33.6 WMe

24.7 Me of N2Npy

8.5 BMe

0.27 SiMe3

0.17 SiMe3

**19F NMR data:** (CD2Cl2, 282.2 MHz, 183 K)

-135.5 6 F, d, 3J = 19.8 Hz *o-*C6F5

-166.8 6 F, app. t, app. 3J = 19.8 Hz *m-*C6F5

-169.7 3 F, t, 3J = 22.7 Hz *p-*C6F5

**11B NMR data:** (CD2Cl2, 160.4 MHz, 183 K)

-15.0 br. s MeB(C6F5)3

**IR data** (KBr pellet, cm-1)

3352 (w), 3300 (w), 2958 (m), 2904 (m), 2850 (w), 2290 (m) ((CN)), 1642 (m), 1606 (m), 1512 (s), 1452 (s), 1382 (w), 1356 (w), 1254 (s), 1168 (w), 1086 (s), 1026 (m), 952 (s), 934 (m), 914 (m), 914 (m), 844 (s), 802 (m), 760 (m), 690 (w), 664 (w), 644 (w), 606 (w), 568 (w), 548 (w), 470 (w), 446 (w), 414 (w).

**[W2(N2Npy)2(NPh)2Me2(-Me)][MeB(C6F5)3] (5)**

Elemental analysis was not obtained for this compound which was insufficiently stable to be isolated.

**1H NMR data:** (CD2Cl2, 500.0 MHz, 298 K)

9.13 2 H, br. s H6

8.16 2 H, td, 3J (H3H4H5) = 7.8 Hz

4J (H4H6) = 1.5 Hz H4

7.72 2 H, d, 3J (H3H4) = 8.3 Hz H3

7.56 2 H, t, 3J (H4H5H6) = 8.3 Hz H5

7.30 4 H, d, 3J = 7.3 Hz *o-*C6H5

7.26 – 7.20 6 H, overlapping m *m-*C6H5 and *p-*C6H5

4.05 4 H, br. s CHH

3.87 4 H, br. s CHH

1.66 6 H, s Me of N2Npy

0.44 3 H, br. s BMe

0.13 36 H, br. s SiMe3

W-Me resonances too broad to be observed at room temperature

**1H NMR data:** (CD2Cl2, 500.0 MHz, 193 K)

9.12 2 H, br. s H6

8.19 2 H, br. s H4

7.71 2 H, br. s H3

7.55 6 H, br. s H5 and *m-*C6H5

7.26 6 H, br. s *o-*C6H5 and *p-*C6H5

4.09 4 H, br. s CHH

3.88 4 H, br. s CHH

1.64 6 H, br. s Me of N2Npy

1.10 3 H, br. s WMebridging

0.33 3 H, br. s BMe

0.10 6 H, br. s WMeterminal

0.08 36 H, br. s SiMe3

**13C{1H} NMR data:** (CD2Cl2, 125.7 MHz, 193 K)

161.0 C2

154.8 *ipso-*C6H5

148.3 C6F5

147.2 C6

146.4 C6F5

144.6 *o-*C6H5

137.6 C6F5

136.6 C6F5

135.8 C6F5

134.7 C6F5

128.9 *m-*C6H5

128.5 *p-*C6H5

127.8 C4

124.8 C5

123.3 C3

64.8 CH2NSiMe3

48.1 C(CH2NSiMe3)2

38.5 WMeterminal

36.5 WMebridging

21.0 Me of N2Npy

8.5 BMe

0.0 SiMe3

**19F NMR data:** (CD2Cl2, 282.2 MHz, 183 K)

-135.5 6 F, d, 3J = 19.8 Hz *o-*C6F5

-166.8 6 F, app. t, app. 3J = 19.8 Hz *m-*C6F5

-169.7 3 F, t, 3J = 22.7 Hz *p-*C6F5

**11B NMR data:** (CD2Cl2, 160.4 MHz, 183 K)

-15.0 br. s MeB(C6F5)3

**[W(N2Npy){PhNC(O)O}Me][MeB(C6F5)3] (6)**

To a stirred solution of [W(NPh)(N2Npy)Me2] (**2**) (150 mg, 0.243 mmol) in CH2Cl2 (20 ml) cooled to 0 C was added a solution of B(C6F5)3 (125 mg, 0.243 mmol) in CH2Cl2 (20 ml). The reaction was freeze-pump-thaw degassed 3 times before adding CO2 (1 atm). After stirring at rt for 1 h the solvent was removed under reduced pressure to afford **6** as a golden brown solid in 96 mg (0.082 mmol, 34 %) yield.

**Elemental analysis for C42H40BF15N4O2Si2W**

Found (calculated): C 43.0 (43.2), 3.8 (3.5), 4.9 (4.8) %

**1H NMR data:** (CD2Cl2, 500.0 MHz, 298 K)

8.80 1 H, dd, 3J (H5H6) = 5.9 Hz

4J = (H4H6) = 1.5 Hz H6 of 2-C5H4N

8.21 1 H, td, 3J (H3H4H5) = 7.8 Hz

4J = (H4H6) = 1.7 Hz H4 of 2-C5H4N

7.83 1 H, d, 3J (H3H4) = 8.3 Hz H3 of 2-C5H4N

7.66 1 H, td, 3J (H4H5H6) = 5.6 Hz

4J (H3H5) = 1.3 Hz H5 of 2-C5H4N

7.57 2 H, app. t, app. 3J = 7.6 Hz *m-*C6H5

7.33 2 H, d, 3J = 7.6 Hz *o-*C6H5

7.26 1 H, t, 3J = 7.6 Hz *p-*C6H5

4.31 1 H, d, 2J = 16.1 Hz CHH

4.10 1 H, d, 2J = 16.4 Hz CHH

3.80 1 H, d, 2J = 12.4 Hz CHH

3.08 1 H, d, 2J = 12.7 Hz CHH

1.68 3 H, s Me of N2Npy

1.40 3 H, s, 2J(WH) = 6.8 Hz (15 %) WMe

0.45 3 H, br. s BMe

0.40 9 H, s SiMe3

0.04 9 H, s SiMe3

**13C{1H} NMR data:** (CD2Cl2, 125.7 MHz, 298 K)

166.6 CO

162.6 C2 of 2-C5H4N

155.0 *ipso-*C6H5

151.2 1J (CH) = 166 Hz C*6* of 2-C5H4N

150.5 C6F5

149.3 C6F5

144.1 1J (CH) = 160 Hz *o-*C6H5

140.3 C6F5

139.3 C6F5

138.3 C6F5

137.2 C6F5

130.9 1J (CH) = 166 Hz C4 of 2-C5H4N

130.2 1J (CH) = 157 Hz *m-*C6H5

128.7 1J (CH) = 166 Hz *p-*C6H5

126.4 1J (CH) = 164 Hz C5 of 2-C5H4N

123.4 1J (CH) = 167 Hz C3 of 2-C5H4N

66.0 1J (CH) = 131 Hz CH2NSiMe3

51.3 C(CH2NSiMe3)

44.5 1J (CH) = 125.0 Hz

1J (WC) = 92 Hz (15 %) WMe

20.4 1J (CH) = 129 Hz Me of N2Npy

10.5 1J (CH) = 117.4 Hz BMe

0.8 1J (CH) = 122 Hz SiMe3

-1.2 1J (CH) = 120 Hz SiMe3

**19F NMR data:** (CD2Cl2, 282.2 MHz, 298 K)

-133.4 6 F, d, 3J = 19.8 Hz *o-*C6F5

-165.6 6 F, app. t, app. 3J = 19.8 Hz *m-*C6F5

-168.1 3 F, t, 3J = 22.7 Hz *p-*C6F5

**11B NMR data:** (CD2Cl2, 160.4 MHz, 298 K)

-14.7 br. s MeB(C6F5)3

**IR data:** (KBr pellet, cm-1)

3066 (w), 2958 (m), 2908 (m), 2852 (w), 1640 (m), 1608 (m), 1552 (s), 1510 (s), 1482 (s), 1450 (s), 1384 (m), 1356 (m), 1258 (s), 1230 (w), 1170 (w), 1146 (w), 1086 (s), 1032 (m), 1020 (m), 966 (s), 952 (s), 934 (m), 838 (s), 816 (m), 786 (m), 762 (m), 732 (w), 688 (m), 660 (w), 646 (w), 594 (w), 582 (w), 570 (w), 542 (w), 512 (w), 420 (w), 408 (w).

**[W(N2Npy){PhNC(O)NPh}Me][MeB(C6F5)3] (8)**

To a stirred solution of [W(NPh)(N2Npy)Me2] (**2**) (200 mg, 0.324 mmol) in CH2Cl2 (20 ml) cooled to 0 C was added a solution of B(C6F5)3 (166 mg, 0.324 mmol) in CH2Cl2 (20 ml). To the stirred reaction was added phenyl isocyanate (38 mg 35 l, 0.324 mmol). After stirring at rt for 1 h the solvent was removed under reduced pressure to afford **8** as a golden brown solid in 280 mg (0.225 mmol, 69 %) yield.

**Elemental analysis for C48H45BF15N5OSi2W**

Found (calculated): C 46.3 (45.8), H 3.7 (3.7), N 5.4 (5.6) %

**1H NMR data:** (CD2Cl2, 500.0 MHz, 298 K)

8.66 1 H, dd, 3J (H5H6) = 5.6 Hz

4J (H3H6) = 1.2 Hz H6 of 2-C5H4N

8.19 1 H, td, 3J (H3H4H5) = 8.0 Hz

4J (H4H6) = 1.7 Hz H4 of 2-C5H4N

7.84 1 H, d, 3J (H3H4) = 8.0 Hz H3 of 2-C5H4N

7.58 - 7.52 3 H, overlapping m H5 of 2-C5H4N, *m-*C6H5

(trans to pyridyl)

7.29 2 H, dd, 3J = 8.3 Hz, 4J = 1.2 Hz *o-* C6H5 (trans to pyridyl)

7.25 - 7.20 3 H, overlapping m *m-* C6H5 (cis to pyridyl),

*p-* C6H5 (trans to pyridyl)

7.10 1 H, t, 3J = 7.6 Hz *p-* C6H5 (cis to pyridyl)

6.81 2 H, d, 3J = 8.3 Hz *o-* C6H5 (cis to pyridyl)

4.22 1 H, d, 2J = 16.1 Hz CHH

4.04 1 H, d, 2J = 16.3 Hz CHH

3.63 1 H, d, 2J = 12.0 Hz CHH

3.14 1 H, d, 2J = 12.2 Hz CHH

1.70 3 H, s Me of N2Npy

1.23 3 H, s, 2J (WH) = 6.5 Hz (15 %) WMe

0.45 3 H, br. s BMe

0.40 9 H, s SiMe3

-0.09 9 H, s SiMe3

**13C{1H} NMR data:** (CD2Cl2, 125.7 MHz, 298 K)

161.2 CO

160.7 C2 of 2-C5H4N

153.8 *ipso-* C6H5 (trans to pyridyl)

149.5 C6F5

149.2 1J (CH) = 161 Hz *o-* C6H5 (trans to pyridyl)

147.7 C6F5

142.2 1J (CH) = 166 Hz C6 of 2-C5H4N

141.1 *ipso-* C6H5 (cis to pyridyl)

138.8 C6F5

137.8 C6F5

136.9 C6F5

135.9 C6F5

129.6 1J (CH) = 159 Hz *o-* C6H5 (cis to pyridyl)

129.5 1J (CH) = 160 Hz *m-* C6H5 (cis to pyridyl)

128.9 1J (CH) = 161 Hz *o-* C6H5 (trans to pyridyl)

127.1 1J (CH) = 163 Hz C4 of 2-C5H4N

126.0 1J (CH) = 161 Hz *m-* C6H5 (trans to pyridyl)

124.8 1J (CH) = 162 Hz *p-* C6H5 (cis to pyridyl)

123.9 1J (CH) = 159 Hz C5 of 2-C5H4N

122.0 1J (CH) = 165 Hz C3 of 2-C5H4N

64.6 1J (CH) =137 Hz CH2NSiMe3

54.6 1J (CH) = 136 Hz CH2NSiMe3

51.2 C(CH2NSiMe3)2

43.1 1J (CH) = 123 Hz (15 %) WMe

21.4 1J (CH) = 128 Hz Me of N2Npy

10.5 BMe

1.9 1J (CH) = 120 Hz SiMe3

-0.2 1J (CH) = 122 Hz SiMe3

**19F NMR data:** (CD2Cl2, 282.2 MHz, 298 K)

-133.4 6 F, d, 3J = 19.8 Hz *o-*C6F5

-165.6 6 F, app. t, app. 3J = 19.8 Hz *m-*C6F5

-168.1 3 F, t, 3J = 22.7 Hz *p-*C6F5

**11B NMR data:** (CD2Cl2, 160.4 MHz, 298 K)

-14.7 br. s MeB(C6F5)3

**IR data** (KBr pellet, cm-1)

3064 (w), 2958 (m), 2908 (m), 2856 (m), 2262 (w), 1948 (w), 1642 (s), 1608 (s), 1596 (m), 1584 (m), 1510 (s), 1454 (w), 1382 (w), 1358 (m), 1296 (m), 1258 (s), 1086 (s), 1046 (m), 1020 (m), 980 (s), 834 (m), 788 (m), 688 (w), 660 (w), 646 (w), 604 (w), 594 (w), 538 (w), 474 (w), 444 (w), 420 (w), 406 (w).
