# Supplementary material for: Synthesis and reactivity of the imidotungsten methyl cation [W(N2Npy)(NPh)Me]+: CO2adds to the WNPh bond and does not insert into the W–Me bond
Source: Royal Society of Chemistry journal article supplement (doi:10.1039/b208327b), 2002-01-01
Supplement: b208327bdft.doc [file b208327bdft.doc]

Synthesis and reactivity of the imidotungsten methyl cation [W(N2Npy)(NPh)Me]: CO2 adds to the W=NPh bond and does not insert into the W-Me bond

**Benjamin D. Ward,*a* Eric Clot,*b* Stuart R. Dubberley,*a* Lutz H. Gade*c* and Philip Mountford*a***

__________________________________________________________________________________

SUPPLEMENTARY INFORMATION: DFT CALCULATIONS

__________________________________________________________________________________

Optimized geometry (B3PW91), cartesian coordinates (Å), and electronic energy (a.u.) for **3**+.

W .044520 -.011597 .165698

C1 4.294969 -.475566 2.185382

C2 2.919106 -.426954 1.982452

N1 2.365615 -.189336 .773144

C3 3.194725 .002820 -.279602

C4 4.584226 -.027693 -.151401

C5 5.147852 -.269468 1.100567

H 4.682866 -.671224 3.177461

H 2.240822 -.582119 2.808504

H 5.208809 .133100 -1.022691

C6 1.683180 -1.034356 -1.986311

C7 2.494326 .232323 -1.588076

H 2.382824 -1.879255 -2.026441

H 1.290700 -.876166 -3.001546

C8 1.710958 1.577452 -1.566094

H 2.440040 2.379149 -1.389458

H 1.274359 1.733677 -2.563000

N2 .624654 1.683080 -.547389

N3 .539394 -1.384631 -1.093761

Si1 -.514706 -2.715269 -1.686076

Si2 -.271227 3.236179 -.498471

H 6.224336 -.298943 1.225911

N4 -1.697920 .003754 .040175

C9 -.138948 -.351839 2.291428

H -1.180691 -.333798 2.620284

H .283704 -1.324392 2.576016

H .398545 .428555 2.845892

C10 -3.067026 -.039395 .207942

C11 -3.661697 -1.134462 .870152

C12 -5.042201 -1.163076 1.054418

C13 -5.840181 -.119186 .573035

C14 -5.253117 .963000 -.093548

C15 -3.873500 1.012238 -.274724

H -3.036079 -1.943086 1.231836

H -5.497462 -2.002461 1.568815

H -6.915084 -.149711 .714088

H -5.872835 1.769595 -.470000

H -3.410276 1.845124 -.791786

H .385262 -3.854035 -2.045837

H -1.434469 -3.087582 -.576299

H -1.264793 -2.249918 -2.894324

H 3.249750 .351529 -2.374606

H .737647 4.326089 -.329268

H -1.200713 3.166339 .663785

H -1.016908 3.419864 -1.784243

E = -878.875206817

Optimized geometry (B3PW91), cartesian coordinates (Å), and electronic energy (a.u.) for **6**+.

W -.271644 .192736 -.426143

C1 -4.658753 -.481257 -1.509101

C2 -3.337364 -.049437 -1.508385

N1 -3.045010 -.705361 .714521

C4 -4.351881 -1.194450 .764637

C5 -5.169054 -1.091429 -.361281

H -5.265999 -.350738 -2.396157

H -2.897903 .402670 -2.388983

H -4.725644 -1.629877 1.684256

C6 -.882507 -1.443359 1.933395

C7 -2.172523 -.581154 1.942039

H -1.177382 -2.497148 2.036871

H -.276189 -1.184570 2.811982

C8 -1.845321 .917912 2.092335

H -2.761756 1.518790 2.019225

H -1.409792 1.098454 3.085973

N2 -.862672 1.291827 1.066368

N3 -.042133 -1.342386 .702413

Si1 .981959 -2.827365 .437029

Si2 -.060109 2.893592 1.397490

H -6.187234 -1.462956 -.337823

N4 1.695656 .492426 -.641311

C9 -.653735 -1.244378 -2.048724

H .351206 -1.581095 -2.337677

H -1.255822 -2.111519 -1.774481

H -1.081162 -.751062 -2.924563

C10 2.930223 .182881 -.017678

C11 4.109898 .054182 -.770913

C12 5.303494 -.273598 -.127816

C13 5.337631 -.477523 1.255441

C14 4.164977 -.342802 2.004176

C15 2.964541 -.012149 1.373505

H 4.091441 .221889 -1.840032

H 6.211692 -.369175 -.713081

H 6.271338 -.729223 1.746243

H 4.186982 -.480486 3.080185

H 2.059661 .126825 1.956408

C16 1.564496 1.318247 -1.770293

O1 .195618 1.347531 -1.940826

O2 2.370902 1.890946 -2.438618

H 1.955014 -2.557456 -.649207

H .011396 -3.908404 .082026

H 1.632044 -3.133131 1.744653

H -2.752635 -.899709 2.815979

H -1.154941 3.909553 1.438086

H .913185 3.165979 .308911

H .594136 2.778765 2.737005

E = -1067.35539626

Optimized geometry (B3PW91), cartesian coordinates (Å), and electronic energy (a.u.) for **7+.**

W -.068671 .033013 -.042070

C1 -4.052790 .039694 2.398877

C2 -2.712060 .097360 2.035587

N1 -2.302720 .146904 .749541

C3 -3.245608 .177562 -.221798

C4 -4.609961 .118069 .069497

C5 -5.024665 .038210 1.397595

H -4.323229 .001423 3.446787

H -1.943562 .130687 2.792620

H -5.331599 .142279 -.738935

C6 -1.897331 1.628467 -1.743742

C7 -2.719969 .322402 -1.623329

H -2.489130 2.463545 -1.346014

H -1.726717 1.826419 -2.812150

C8 -1.968287 -.952787 -2.077202

H -2.672643 -1.794933 -2.036085

H -1.667824 -.819090 -3.126630

N2 -.756330 -1.279637 -1.283113

N3 -.570994 1.578370 -1.077599

Si1 .535584 2.909526 -1.599658

Si2 .008441 -2.848142 -1.700357

H -6.078903 -.010939 1.645668

N4 1.662988 .013629 -.268769

C9 .715669 -.859497 3.855132

H 1.802662 -.995492 3.881941

H .461074 -.031359 4.517945

H .255615 -1.790804 4.189106

C10 3.038582 .007555 -.177080

C11 3.686189 .867885 .736195

C12 5.075513 .853493 .827843

C13 5.828289 -.000762 .012945

C14 5.187389 -.848790 -.897943

C15 3.798264 -.852787 -.996649

H 3.091610 1.528268 1.358106

H 5.574021 1.512102 1.530915

H 6.910455 -.003661 .085691

H 5.772096 -1.507722 -1.530570

H 3.291816 -1.503736 -1.700104

C16 .318777 -.558653 2.451021

O1 .080237 -1.470865 1.601183

O2 .219936 .650892 2.026191

H 1.751560 2.880687 -.745424

H -.219452 4.189475 -1.431966

H .854195 2.693196 -3.045381

H -3.573932 .431955 -2.302800

H -1.016578 -3.921917 -1.517172

H 1.179226 -3.046456 -.804183

H .424581 -2.795897 -3.139087

E = -1067.43602920
